# Supplementary material for: Near-infrared absorbance properties of Cu2−xS/SiO2 nanoparticles and their PDMS-based composites
Source: Royal Society of Chemistry journal article supplement (doi:10.1039/c7tc04784c), 2017-11-14
Supplement: c7tc04784c1.pdf [file c7tc04784c1.pdf]

Electronic Supplementary Information

**Near-infrared Absorbance Properties of  $\text{Cu}_{2-x}\text{S}/\text{SiO}_2$  Nanoparticles and  
Their PDMS-based Composites**

Young-Tae Kwon,<sup>#</sup> Gu-Dam Lim,<sup>#</sup> Seil Kim, Seung Han Ryu, Tae-Yeon Hwang, Kee-Ryung Park and Yong-  
Ho Choa\*

Department of Fusion Chemical Engineering, Hanyang University, Ansan 15588, Republic of Korea

\* Corresponding authors

E-mail address: [choa15@hanyang.ac.kr](mailto:choa15@hanyang.ac.kr) (Y.-H. Choa)

<sup>#</sup>These authors equally contributed to this work.

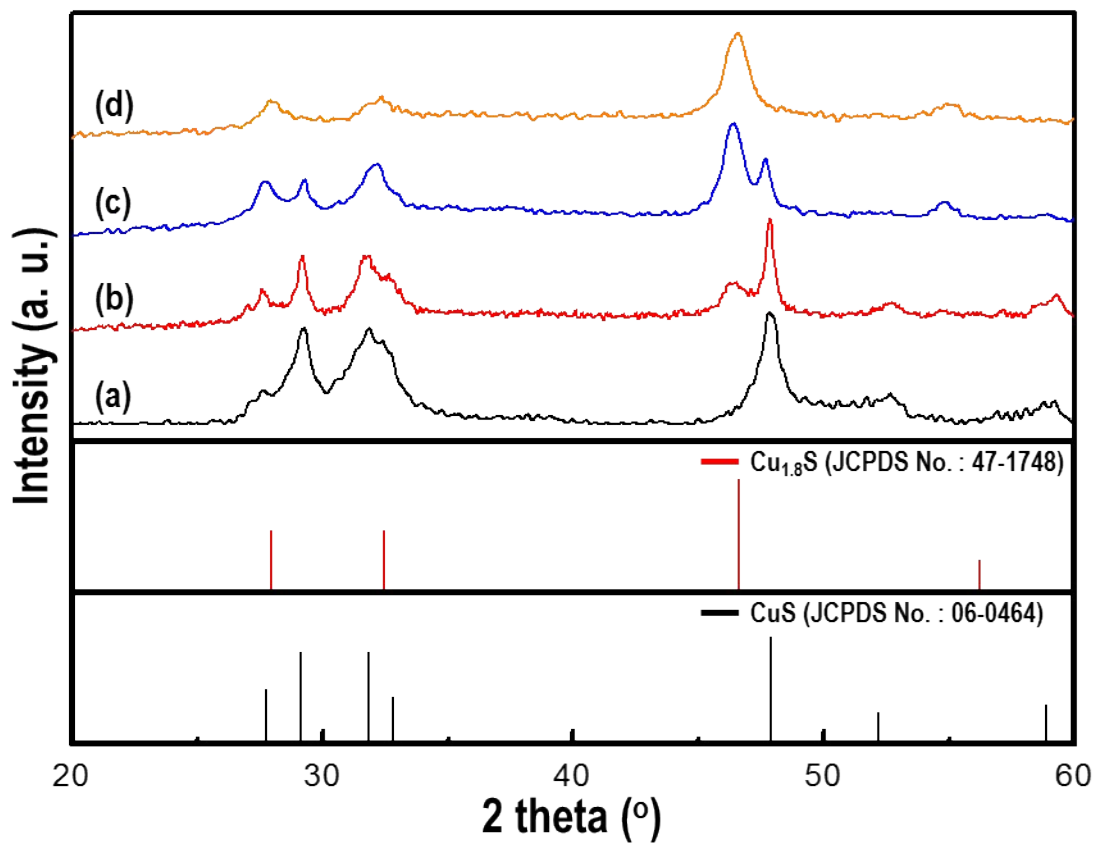

**Figure S1.** XRD patterns of the Cu<sub>2-x</sub>S NPs prepared at ascorbic acid concentrations of (a) 0 M, (b) 0.1 M, (c) 0.3 M, and (d) 0.5 M. The bars are from the JCPDS standards for CuS (06-0464) and Cu<sub>1.8</sub>S (47-1748).

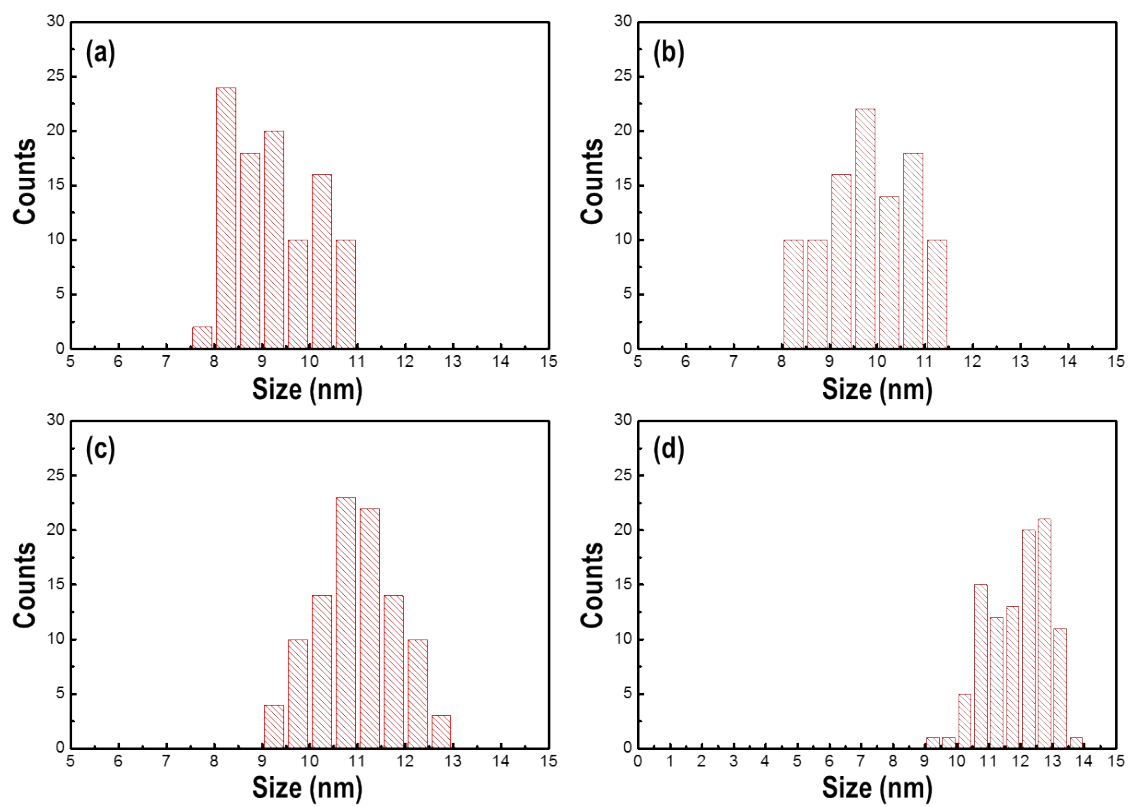

**Figure S2.** Size histograms of (a) CuS, (b) Cu<sub>1.8</sub>S, (c) CuS/SiO<sub>2</sub>, and (d) Cu<sub>1.8</sub>S/SiO<sub>2</sub> NPs.

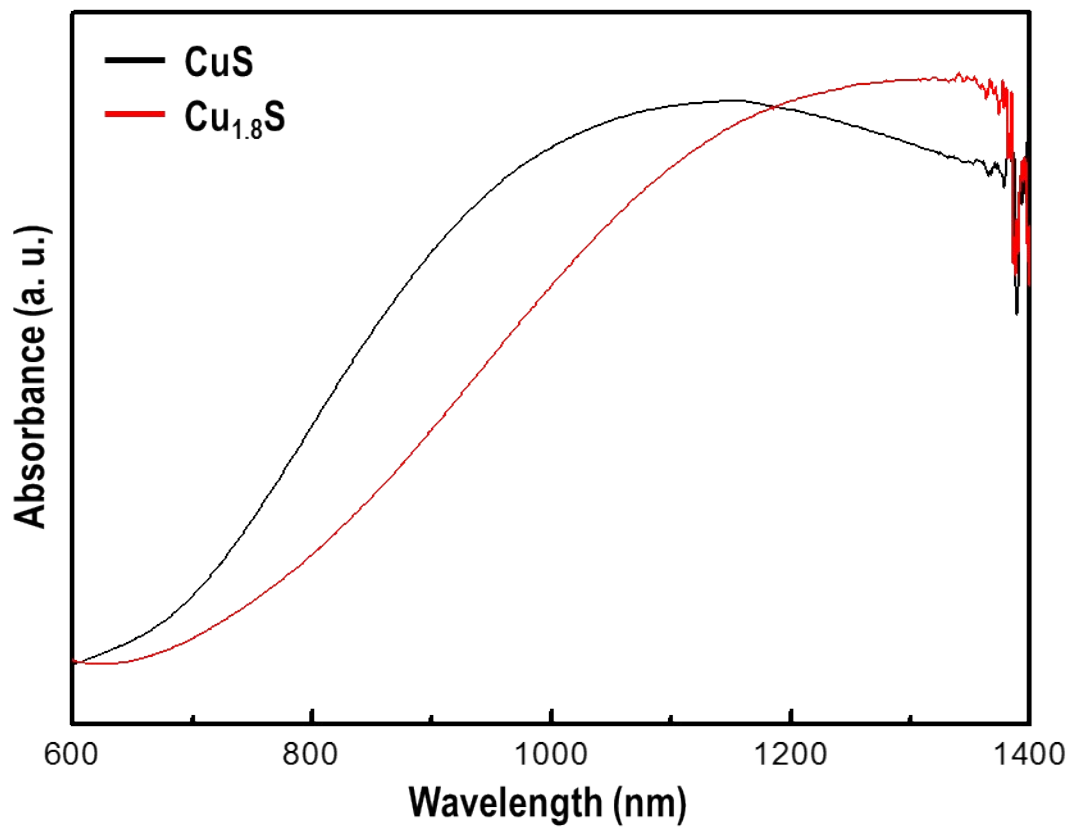

**Figure S3.** The absorbance spectra of the CuS and Cu<sub>1.8</sub>S NPs.

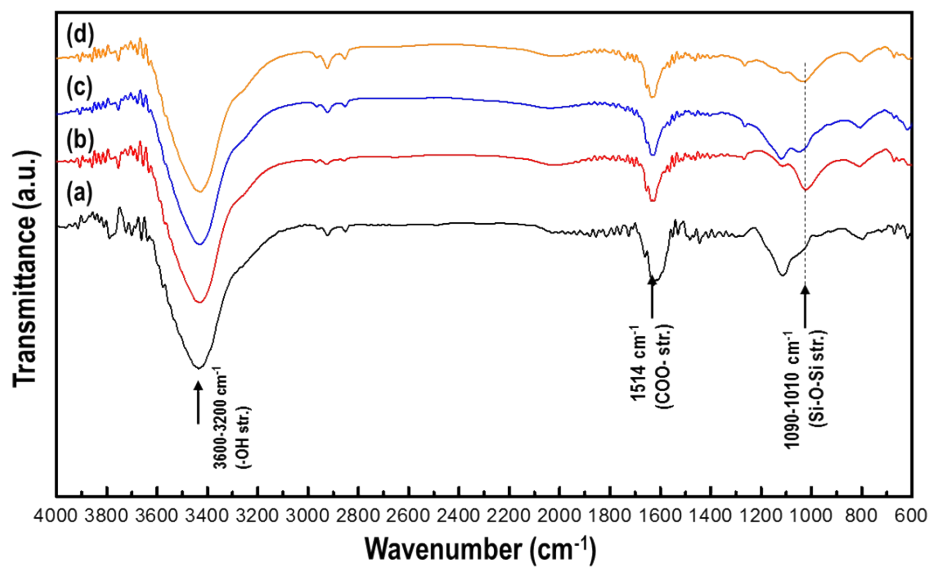

**Figure S4.** The FT-IR spectra of the (a) CuS, (b) CuS/SiO<sub>2</sub>, (c) Cu<sub>1.8</sub>S, and (d) Cu<sub>1.8</sub>S/SiO<sub>2</sub> NPs.

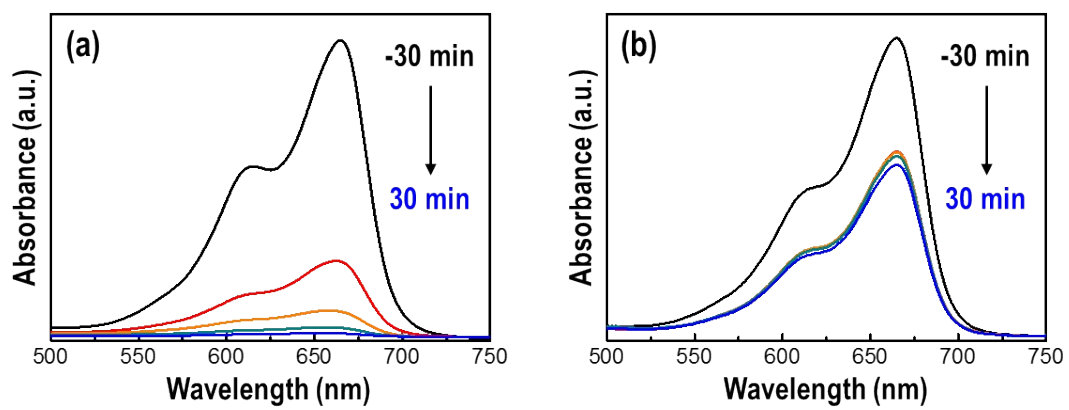

**Figure S5.** The absorption spectra of the photocatalytic degradation of a methylene blue solution in the presence of (a) CuS and (b) CuS/SiO<sub>2</sub> NPs under lamp irradiation for 30 min.

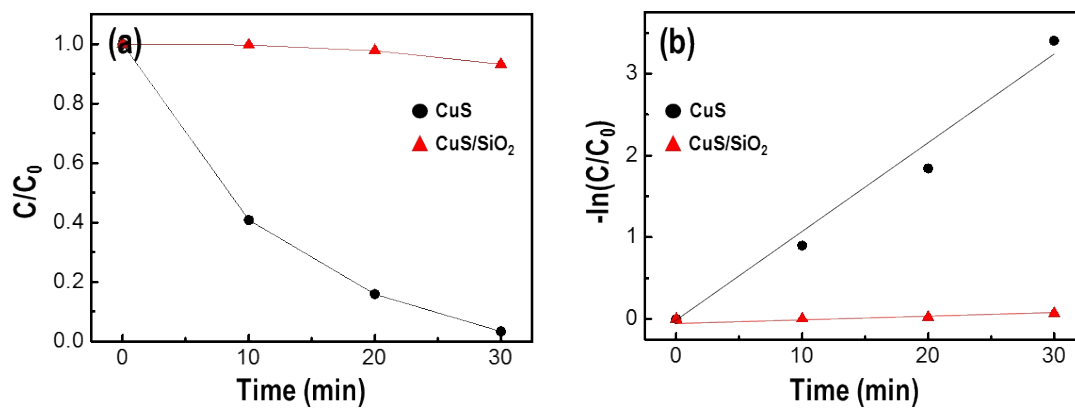

**Figure S6.** (a) The photocatalytic activity and (b) kinetic rate of photo-degradation of methylene blue in the presence of CuS and CuS/SiO<sub>2</sub> NPs under lamp irradiation for 30 min.

### **Photocatalytic properties**

Previous reports have shown that copper sulfide is a highly-effective photocatalyst due to its narrow band gap.<sup>1-5</sup> In the catalytic reaction over copper sulfide,  $H_2O_2$  plays an important role because this reaction is similar to a Fenton reaction.<sup>3</sup> Hydroxyl radicals, which are capable of degrading organic compounds, can be efficiently generated in the presence of  $H_2O_2$ .<sup>4,5</sup> To demonstrate the photo-degradation ability of CuS NPs, we investigated the photocatalytic activity using methylene blue as an organic dye. Fig. S5 shows the time-dependent absorption spectra of a methylene blue solution with different photocatalysts under lamp irradiation. The concentration of MB was observed by measuring the absorbance at a wavelength of 665 nm, which is characteristic of MB. Indeed, the decrease of the absorbance at 665 nm indicates the photo-degradation efficiency of MB. It is clearly demonstrated that the maximum absorbance peak decreases over CuS and CuS/SiO<sub>2</sub> NPs after 30 min of irradiation, as shown in Fig. S5. It should be noted that the CuS NPs led to complete photo-degradation after 30 min, as shown in Fig. S5 (a). Fig. S6 indicates the photocatalytic activity and kinetic rate of photo-degradation using the absorbance intensity at 665 nm. Remarkably, only 6.80 % of MB was degraded in 30 min when the silica-treated CuS NPs were used as a photocatalyst. The photo-degradation efficiency of the CuS/SiO<sub>2</sub> NPs is much less than that of CuS NPs. It is well known that the silica coating can reduce the photocatalytic activity by acting as a passivation layer. Thus, the silica layer prohibits the photo-degradation reaction of MB on the surface of CuS NPs.



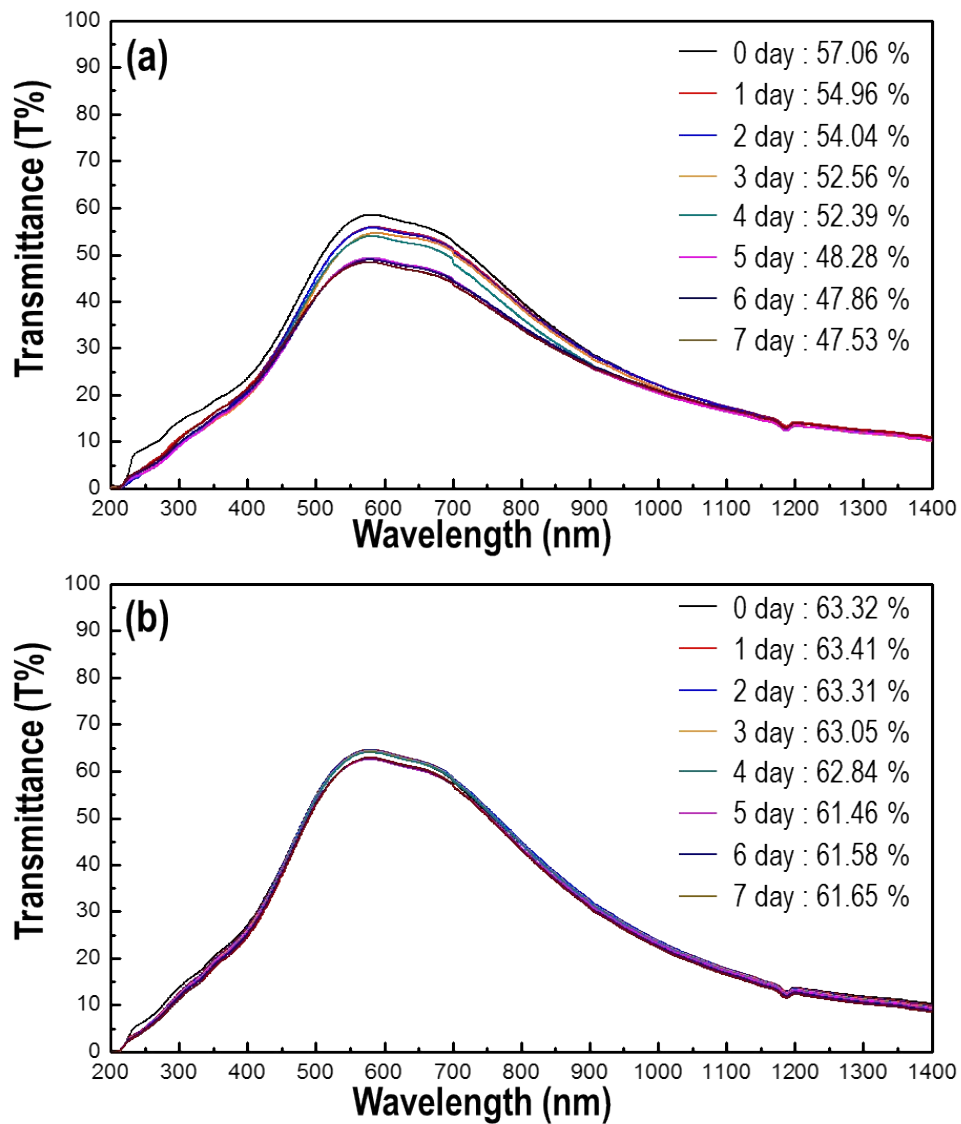

**Figure S7.** UV-vis spectra of (a) CuS - PDMS and (b) CuS/SiO<sub>2</sub> - PDMS films with respect to the high-temperature and high-humidity test time (85 °C - 85% test) for 1 week.

Before test

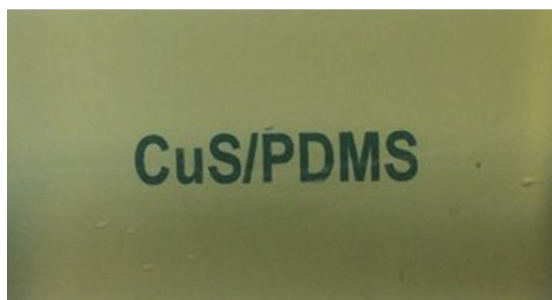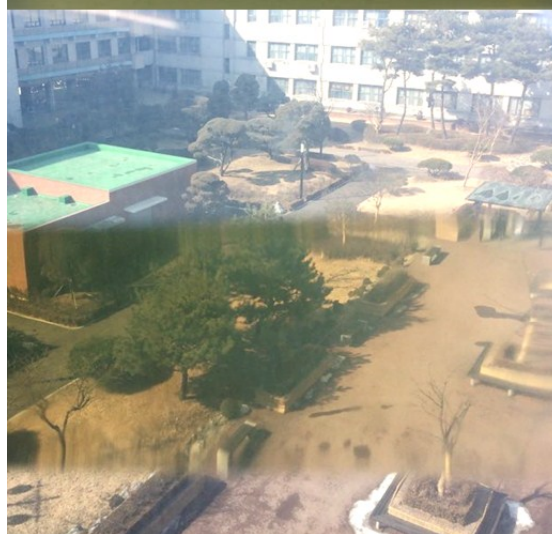

After trest

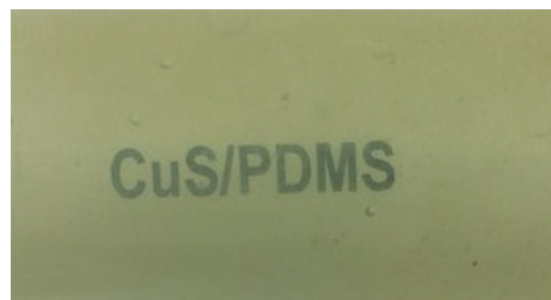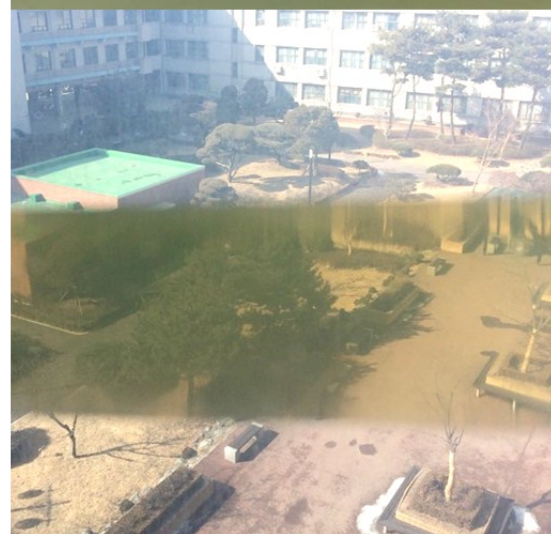

**Figure S8.** Typical photographs of the CuS - PDMS film before and after the high-temperature and high-humidity test (85 °C - 85% test).

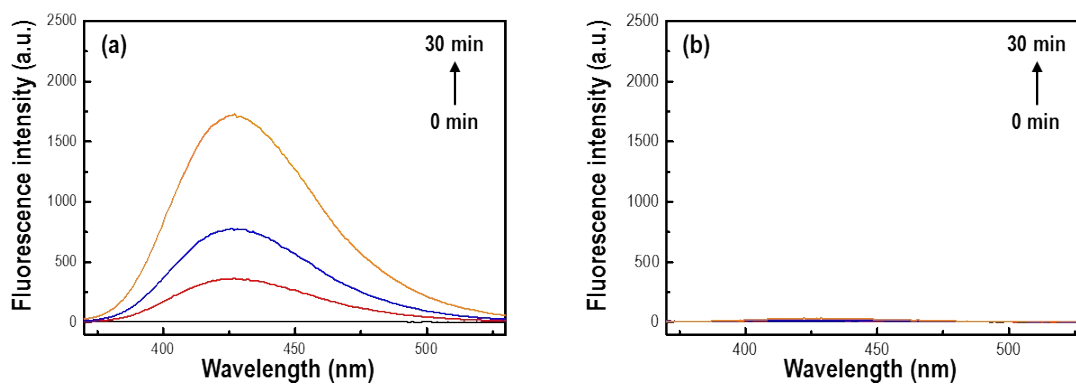

**Figure S9.** PL spectrum changes of  $5 \times 10^{-4}$  M basic solution of terephthalic acid with (a) CuS and (b) CuS/SiO<sub>2</sub> NPs during light irradiation.

## Reference

1. W. Xu, S. Zhu, Y. Liang, Z. Li, Z. Cui, X. Yang and A. Inoue, *Sci. Rep.*, 2015, 5.
2. J. Huang, Y. Wang, C. Gu and M. Zhai, *Mater. Lett.*, 2013, **99**, 31-34.
3. Z. Li, L. Mi, W. Chen, H. Hou, C. Liu, H. Wang, Z. Zheng and C. Shen, *CrystEngComm*, 2012, **14**, 3965-3971.
4. M. Tanveer, C. Cao, Z. Ali, I. Aslam, F. Idrees, W. S. Khan, F. K. But, M. Tahir and N. Mahmood, *CrystEngComm*, 2014, **16**, 5290-5300.
5. J. Kundu and D. Pradhan, *ACS Appl. Mater. Inter.*, 2014, **6**, 1823-1834.
